# Supplementary material for: The photovoltaic effect in a [001] orientated ZnO thin film and its physical mechanism
Source: Royal Society of Chemistry journal article supplement (doi:10.1039/c6ra26984b), 2017-01-01
Supplement: c6ra26984b1.pdf [file c6ra26984b1.pdf]

## Supporting Information

### The Photovoltaic Effect in [001] Orientated ZnO Thin Film and Physical Mechanism

*Bin Liu,<sup>a, #</sup> Jinlei Wang,<sup>a, #</sup> Cuijin Pei,<sup>a</sup> Lichao Ning,<sup>b</sup> Lijuan Cheng,<sup>a</sup> Congjie Zhang,<sup>b</sup> Heqing Yang,<sup>a, \*</sup> and Shengzhong (Frank) Liu<sup>c</sup>*

<sup>a</sup>Shaanxi Key Laboratory for Advanced Energy Devices; Shaanxi Engineering Laboratory for Advanced Energy Technology; Key Laboratory of Macromolecular Science of Shaanxi Province, School of Materials Science and Engineering, Shaanxi Normal University, Xi'an, 710119, China.

<sup>b</sup>Key Laboratory of Macromolecular Science of Shaanxi Province, School of Chemistry and Chemical Engineering, Shaanxi Normal University, Xi'an, 710119, China

<sup>c</sup>Key Laboratory of Applied Surface and Colloid Chemistry, National Ministry of Education; Shaanxi Key Laboratory for Advanced Energy Devices; Shaanxi Engineering Lab for Advanced Energy Technology, School of Materials Science and Engineering, Shaanxi Normal University, Xi'an 710119, China.

# : These authors contributed equally to this work.

\* Corresponding Author:

E-mail: hqyang@snnu.edu.cn.

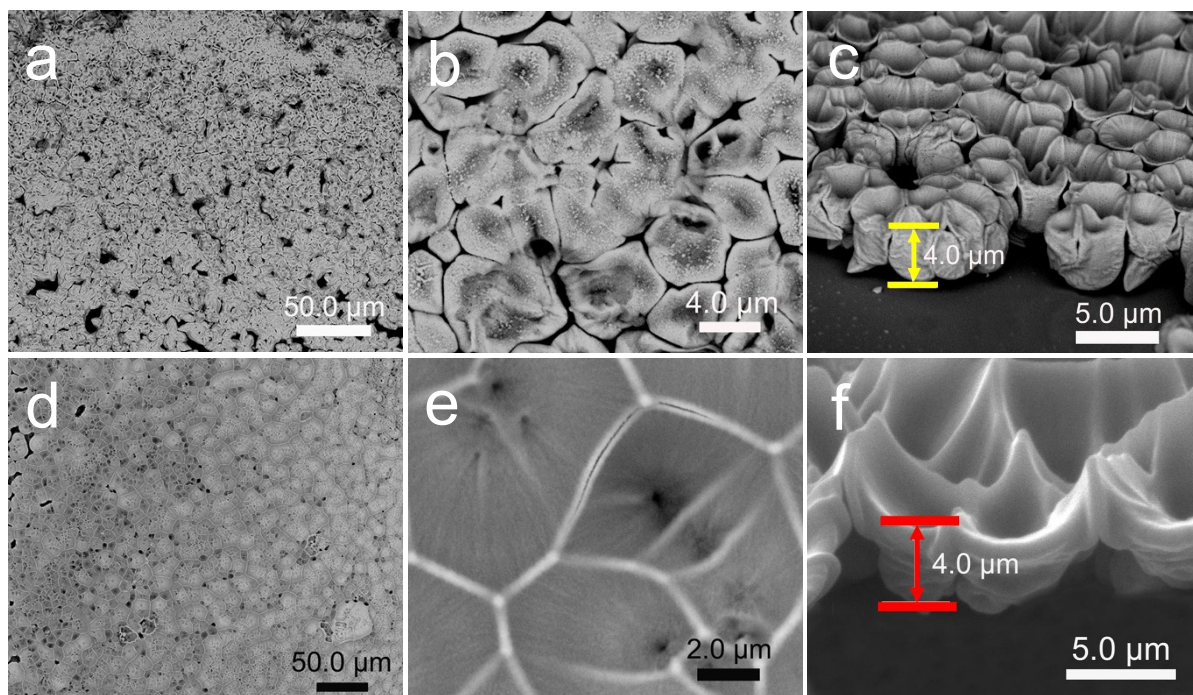

**Fig. S1.** SEM images of ZnO thin films synthesized by heating  $\text{Zn}(\text{NO}_3)_2$  solutions at (a-c) 350 and (d-f) 550 °C for 10 min on the FTO glass substrates.

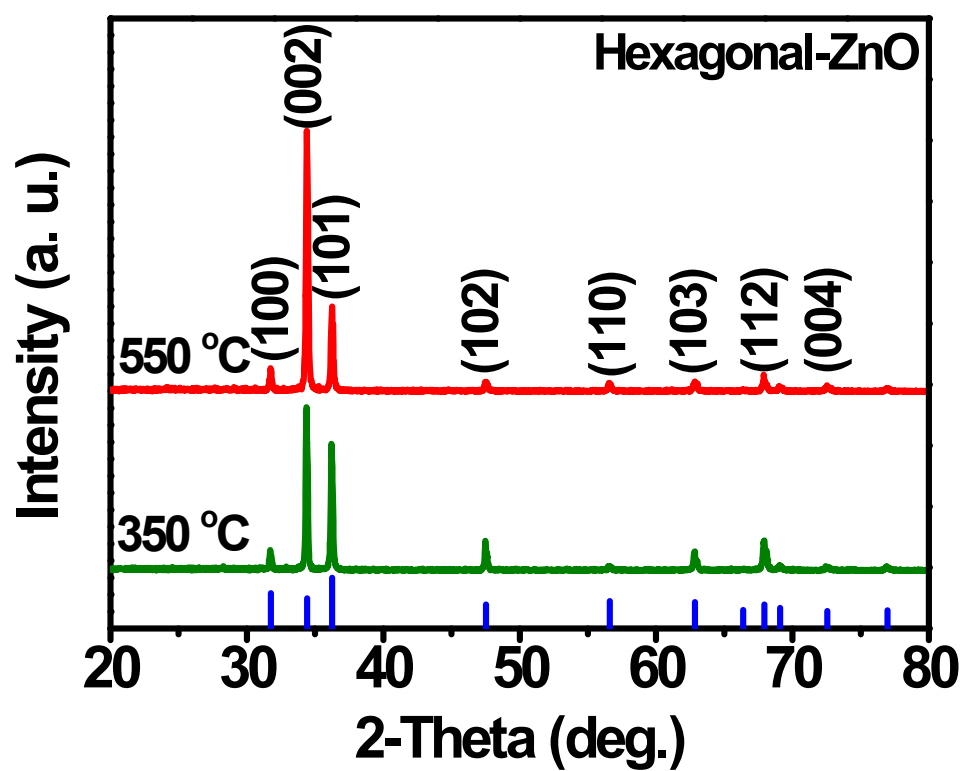

**Fig. S2.** XRD patterns of ZnO thin films synthesized by heating  $\text{Zn}(\text{NO}_3)_2$  solutions at 350 and 550 °C for 10 min on the FTO glass substrates.

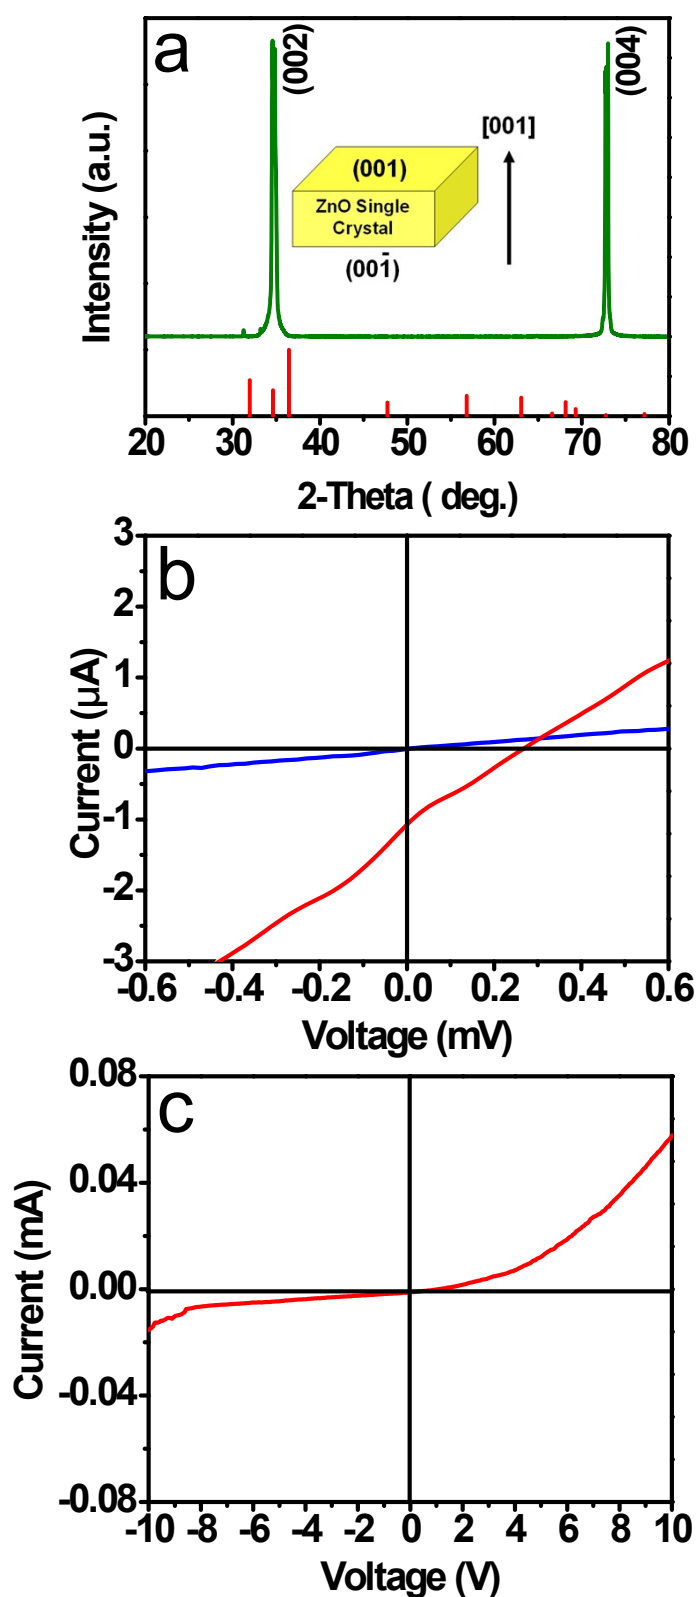

**Fig. S3.** (a) XRD patterns of the ZnO wafer (the inset in (a) is schematic illustration of the crystal orientation). (b) Photovoltaic property of the ZnO wafer under the UV lamp illumination. (c) Dark I-V curves of this the ZnO wafer along [001] direction.
